# Supplementary material
Source: Springer Nature journal article supplement (https://www.springermedizin.de/resource/supplementary/12888_2013_1584_MOESM1_ESM.pdf/9481440)
Supplement: MOESM1 [file 9481440]

# Reported stressors in work and private life

■ Women ■ Men

Work

Private

Voluntary engagement in association

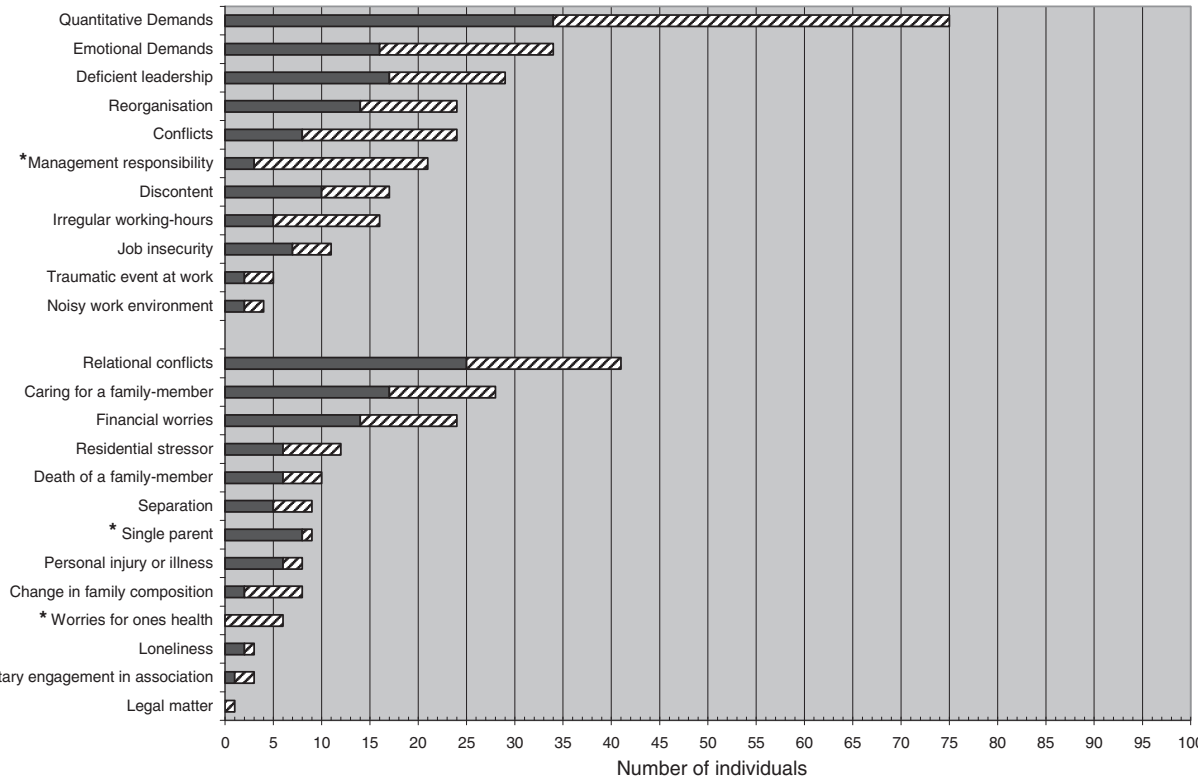

\*Significant difference in proportions between women and men
